# Supplementary material
Source: PubMed Central journal article supplement (PMC3972371)
Supplement: NIHMS552183-supplement-01.pdf [file NIHMS552183-supplement-01.pdf]

**Online Table I:** Characteristics of children hospitalized with bronchiolitis, n=100

| <b>Characteristics</b>                                     | <b>n</b> | <b>%</b>      |
|------------------------------------------------------------|----------|---------------|
| Age in months, median (IQR)                                | 55       | 3.4 (1.2-7.9) |
| Male                                                       | 64       | 64            |
| Race                                                       |          |               |
| White                                                      | 58       | 58            |
| Black                                                      | 22       | 22            |
| Other or missing                                           | 20       | 20            |
| Hispanic                                                   | 36       | 36            |
| Gestational age, weeks                                     |          |               |
| <32                                                        | 6        | 6             |
| 32-36.9                                                    | 16       | 16            |
| ≥37 or 'full term'                                         | 78       | 78            |
| Either parent with history of asthma                       | 39       | 39            |
| Maternal smoking during pregnancy                          | 10       | 10            |
| Child exposed to environmental tobacco smoke               | 4        | 4             |
| Breastfed                                                  | 70       | 70            |
| History of wheeze                                          | 18       | 18            |
| Taken antibiotic during week preceding pre-admission visit | 22       | 22            |
| Wheeze during pre-admission visit*                         | 59       | 61            |
| <b>Virology:</b>                                           |          |               |
| RSV only                                                   | 71       | 71            |
| HRV only                                                   | 16       | 16            |
| RSV and HRV                                                | 5        | 5             |
| <b>Inpatient:</b>                                          |          |               |
| ICU stay during inpatient visit                            | 35       | 35            |
| LOS in days, median (IQR)                                  | 100      | 2 (2-4)       |

Abbreviations: IQR, interquartile range; RSV, respiratory syncytial virus; HRV, human rhinovirus; ICU, intensive care unit; LOS, length of stay.

\*Three subjects excluded from count due to missing data regarding the presence of wheeze during pre-admission visit.

**Online Table II:** Mean relative abundance of genera present in children with severe bronchiolitis with acute wheezing on admission compared to those who did not have acute wheezing on admission

| <b>Genus</b>          | <b>% Abundance-<br/>Wheeze</b> | <b>% Abundance-<br/>No Wheeze</b> | <b>P-value</b> | <b>Q-value</b> |
|-----------------------|--------------------------------|-----------------------------------|----------------|----------------|
| <i>Moraxella</i>      | 10.30%                         | 3.64%                             | 0.01           | 0.16           |
| <i>Prevotella</i>     | 2.93%                          | 0.85%                             | 0.04           | 0.35           |
| <i>Porphyromonas</i>  | 1.09%                          | 0.27%                             | 0.03           | 0.35           |
| <i>Staphylococcus</i> | 0.18%                          | 0.62%                             | 0.01           | 0.16           |
| <i>Leptotrichia</i>   | 0.22%                          | < 0.005%                          | 0.001          | 0.02           |
